# Supplementary material
Source: Springer Nature journal article supplement (https://www.springermedizin.de/resource/supplementary/13058_2013_3451_MOESM1_ESM.pdf/9704056)
Supplement: MOESM1 [file 9704056]

## PARTICIPATING CENTERS

---

- CENTRE HOSPITAL DE MANRESA, BARCELONA
- CENTRO ONCOLÓGICO DE GALICIA, A CORUÑA
- CLÍNICA ONCOLÓGICA CORACHÁN, BARCELONA
- COMPLEJO HOSPITAL CIUDAD REAL, CIUDAD REAL
- COMPLEJO HOSPITAL ORENSE, ORENSE
- COMPLEJO HOSPITAL UNIVERSITARIO A CORUÑA, A CORUÑA
- COMPLEJO HOSPITALARIO DE JAÉN, JAÉN
- CONSORCI HOSPITAL PARC TAULÍ, BARCELONA
- CONSORCI SANITARI DE TERRASA, TARRASA
- FUNDACIÓN HOSPITAL ALCORCÓN, MADRID
- HOSPITAL ARNAU DE VILANOVA, VALENCIA
- HOSPITAL CLINIC I PROVINCIAL, BARCELONA
- HOSPITAL CLÍNICO UNIVERSITARIO DE VALENCIA, VALENCIA
- HOSPITAL CLÍNICO UNIVERSITARIO SAN CARLOS, MADRID
- HOSPITAL COMARCAL DE BARBASTRO, HUESCA
- HOSPITAL DE CABUEÑES, ASTURIAS
- HOSPITAL DE CRUCES, BILBAO
- HOSPITAL DE ELDA, ALICANTE
- HOSPITAL DE LA RIBERA, VALENCIA
- HOSPITAL DE LEÓN, LEÓN
- HOSPITAL DE NAVARRA, NAVARRA
- HOSPITAL DE TXAGORRITXU, VITORIA
- HOSPITAL DEL ESPÍRITU SANTO, BARCELONA
- HOSPITAL DEL MAR, BARCELONA
- HOSPITAL DONOSTIA, SAN SEBASTIÁN
- HOSPITAL DR. NEGRÍN, GRAN CANARIA
- HOSPITAL DR. PESET, VALENCIA
- HOSPITAL G. DE ALICANTE, ALICANTE
- HOSPITAL GENERAL DE ELCHE, ALICANTE
- HOSPITAL GENERAL DE GUADALAJARA, GUADALAJARA
- HOSPITAL GENERAL DE JEREZ, CÁDIZ
- HOSPITAL GENERAL DE MÓSTOLES, MADRID
- HOSPITAL GENERAL UNIVERSITARIO DE VALENCIA, VALENCIA
- HOSPITAL GERMANS TRÍAS I PUJOL, BADALONA
- HOSPITAL INSULAR, GRAN CANARIA
- HOSPITAL JUAN RAMÓN JIMÉNEZ, HUELVA
- HOSPITAL LUCUS AUGUSTI, LUGO
- HOSPITAL MORALES MESSEGUER, MURCIA

- HOSPITAL MUNICIPAL DE BADALONA, BADALONA
  - HOSPITAL MUTUA TERRASA, TARRASA
  - HOSPITAL PROVINCIAL DE CÓRDOBA, CÓRDOBA
  - HOSPITAL PROVINCIAL DE LA MISERICORDIA, TOLEDO
  - HOSPITAL PROVINCIAL DE ZAMORA, ZAMORA
  - HOSPITAL PUERTA DE HIERRO, MADRID
  - HOSPITAL PUERTA DEL MAR, CÁDIZ
  - HOSPITAL PUERTO DE SAGUNTO, VALENCIA
  - HOSPITAL RAMÓN Y CAJAL, MADRID
  - HOSPITAL RÍO CARRIÓN, PALENCIA
  - HOSPITAL SANT JOAN DE REUS, TARRAGONA
  - HOSPITAL UNIVERSITARIO DE CANARIAS, TENERIFE
  - HOSPITAL UNIVERSITARIO DE SALAMANCA, SALAMANCA
  - HOSPITAL UNIVERSITARIO DE VALLADOLID, VALLADOLID
  - HOSPITAL UNIVERSITARIO LA FE, VALENCIA
  - HOSPITAL UNIVERSITARIO MARQUÉS DE VALDECILLA, SANTANDER
  - HOSPITAL UNIVERSITARIO MIGUEL SERVET, ZARAGOZA
  - HOSPITAL UNIVERSITARIO PUERTO REAL, CÁDIZ
  - HOSPITAL UNIVERSITARIO SAN CECLIO, GRANADA
  - HOSPITAL UNIVERSITARIO VIRGEN DE LA ARRIXACA, MURCIA
  - HOSPITAL UNIVERSITARIO VIRGEN DE LA VICTORIA, MÁLAGA
  - HOSPITAL UNIVERSITARIO VIRGEN DEL ROCÍO, SEVILLA
  - HOSPITAL VIRGEN DE LA SALUD, TOLEDO
  - HOSPITAL VIRGEN DE LOS LIRIOS, ALICANTE
  - HOSPITALCOMPLEJOUNIVERSITARIO LOZANO Blesa, ZARAGOZA
  - INSTITUTO VALENCIANO DE ONCOLOGÍA, VALENCIA
  - ONKOLOGIKOA, SAN SEBASTIÁN
-
